# Supplementary material for: Spermine-Mediated Tolerance to Selenium Toxicity in Wheat (Triticum aestivum L.) Depends on Endogenous Nitric Oxide Synthesis
Source: MDPI journal article supplement (doi:10.3390/antiox10111835), 2021-11-19
Supplement: s1 [file s1]

Table S1. The characteristics of the soil, and compost used in the experiment.

| Properties                                                           | Value |
|----------------------------------------------------------------------|-------|
| <b>Soil</b>                                                          |       |
| <i>Texture analysis (%)</i>                                          |       |
| Clay                                                                 | 48    |
| Silt                                                                 | 28    |
| Sand                                                                 | 24    |
| Electrical conductivity <sup>(1)</sup> , EC (mmho cm <sup>-1</sup> ) | 1.5   |
| pH                                                                   | 7.6   |
| Organic carbon (%)                                                   | 0.9   |
| CaCO <sub>3</sub>                                                    | 4.5   |
| <i>Soluble cations (meq L<sup>-1</sup>)</i>                          |       |
| Ca <sup>2+</sup>                                                     | 0.27  |
| Mg <sup>2+</sup>                                                     | 0.26  |
| Na <sup>+</sup>                                                      | 0.48  |
| K <sup>+</sup>                                                       | 0.02  |
| <i>Soluble anions (meq L<sup>-1</sup>)</i>                           |       |
| Cl <sup>-</sup>                                                      | 0.5   |
| SO <sub>4</sub> <sup>2-</sup>                                        | 0.13  |
| <i>Trace element (mg kg<sup>-1</sup>)</i>                            |       |
| Mn                                                                   | 4.7   |
| Fe                                                                   | 3.2   |
| Cu                                                                   | 1.3   |
| Zn                                                                   | 1.2   |
| Ni                                                                   | 0.7   |
| Cd                                                                   | 0.1   |
| <b>Compost</b>                                                       |       |
| Organic carbon (%)                                                   | 31.1  |
| Organic matter (%)                                                   | 53.1  |
| Humic acid (%)                                                       | 33.9  |
| P-Olsen (ppm)                                                        | 60    |
| K <sub>2</sub> O (ppm)                                               | 130   |

(1) Note: The data of electrical conductivity are expressed as mmho cm<sup>-1</sup> considering that 1 dS/m = 1 mmho/cm.

Table S2. A list of primer used for gene expression analysis

| Primer Name                                                        |   | Sequence                        | Accession No.  |
|--------------------------------------------------------------------|---|---------------------------------|----------------|
| Metal tolerance protein ( <i>MTP1</i> )                            | F | 5'- ACGGCCATGACCATCACAATC - 3'  | XM_021028261.1 |
|                                                                    | R | 5'- GCTTGTCTCTCCATGACCA - 3'    |                |
| Metal tolerance protein C3 ( <i>MTPC3</i> )                        | F | 5'- GGACAATCAGCTCCTCCAGA- 3'    | XM_002878137.2 |
|                                                                    | R | 5'-GAAGGTATATGCACGGACGG - 3'    |                |
| <i>Phytochelatinsynthase</i> ( <i>TaPCS1</i> )                     | F | 5'- CAGACCACCATCCACGACTT - 3'   | AF093752.1     |
|                                                                    | R | 5'- ACAGCCTGTTTCATTCCCTTT - 3'  |                |
| Heat shock protein ( <i>HSP70</i> )                                | F | 5'- CCCAGCGCCAGGCCACTAAGGAC-3'  | AF005993       |
|                                                                    | R | 5'- CAAAGCGAGCCCGTGTGATGGTA-3'  |                |
| Natural resistance associated macrophage protein ( <i>NRAMP1</i> ) | F | 5'- GGATTCTCCTGGGTGCTGGGGTT- 3' | XM_015792143.2 |
|                                                                    | R | 5'-GCAACAATCTACTCCCATGGGCC - 3' |                |
